# Supplementary material for: Effect of Ferric Carboxymaltose Versus Low-Dose Intravenous Iron Therapy and Iron Sucrose on the Total Cost of Care in Patients with Iron Deficiency Anemia: A US Claims Database Analysis
Source: Springer Nature journal article supplement (doi:10.1007/s40801-024-00418-1), 2024-03-19

**FCM Cohort**

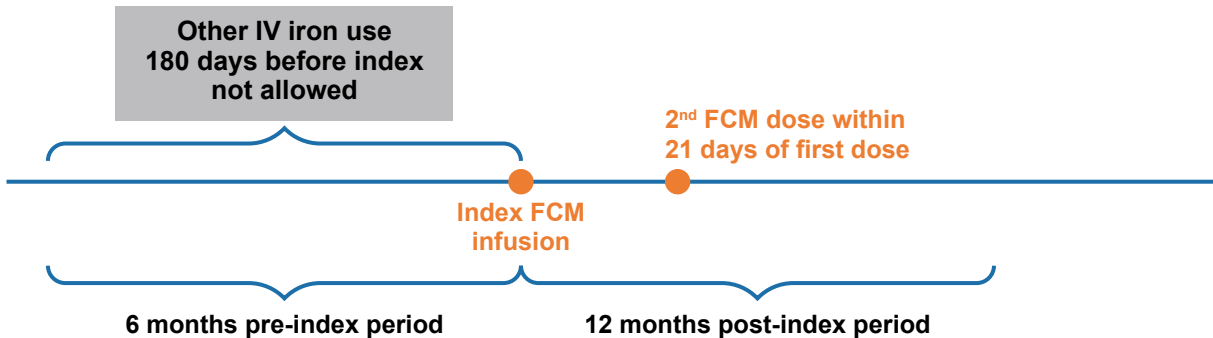

**LDI Cohort**

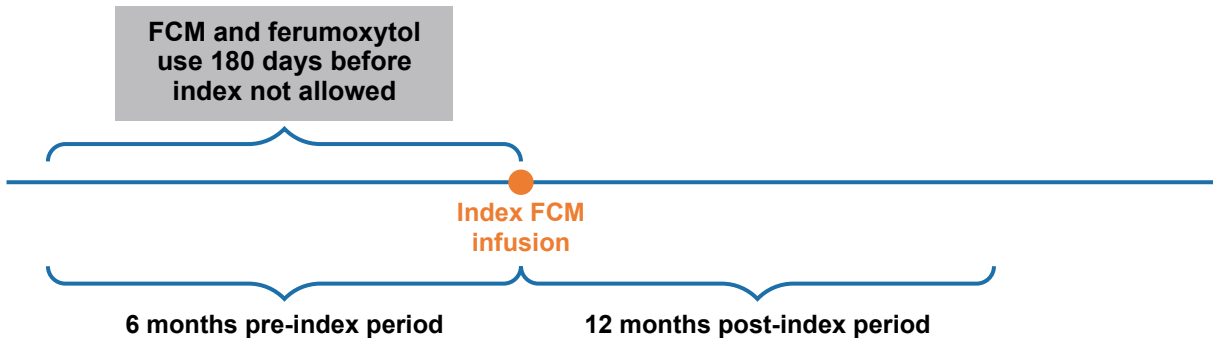

## A. All Patients Cohort: FCM vs LDI

### Distribution of Propensity\_Score\_Wgts

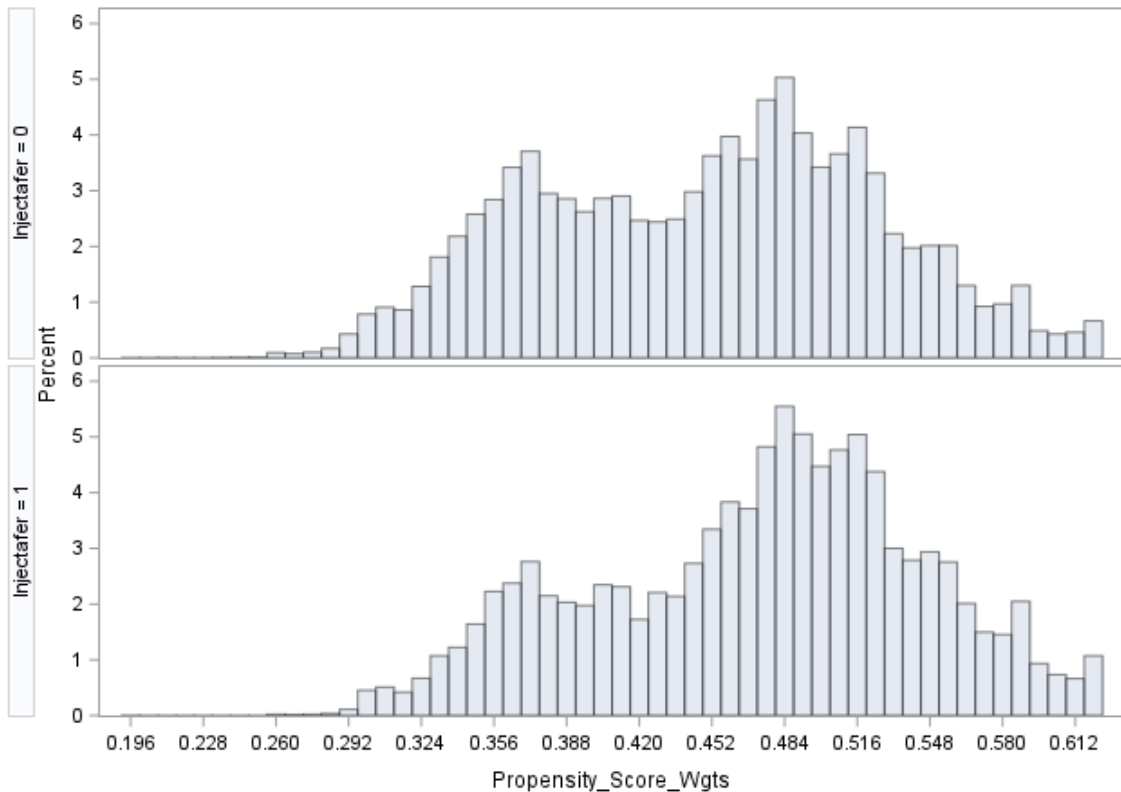

## B. CHF Cohort: FCM vs LDI

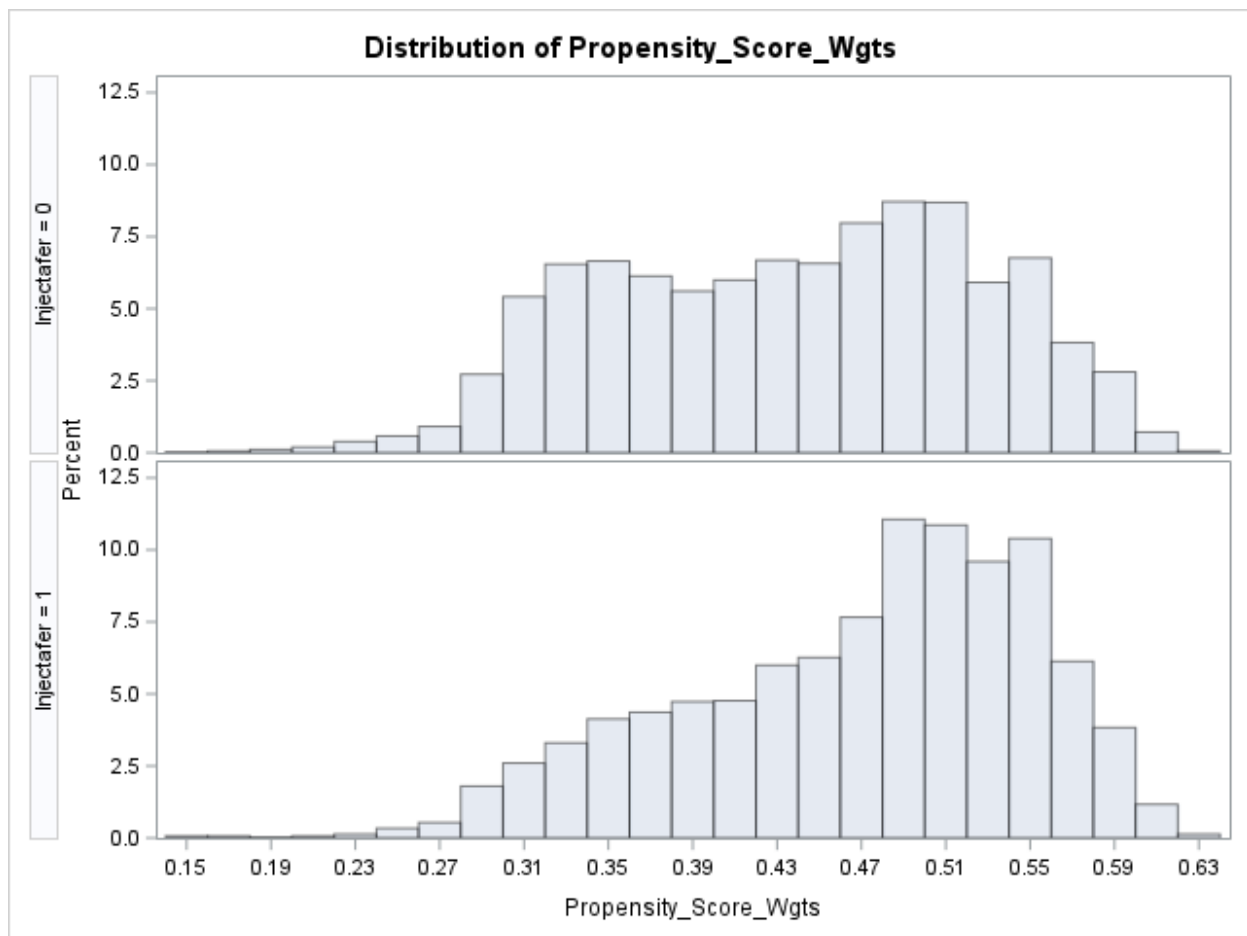

### C. CKD Cohort: FCM vs LDI

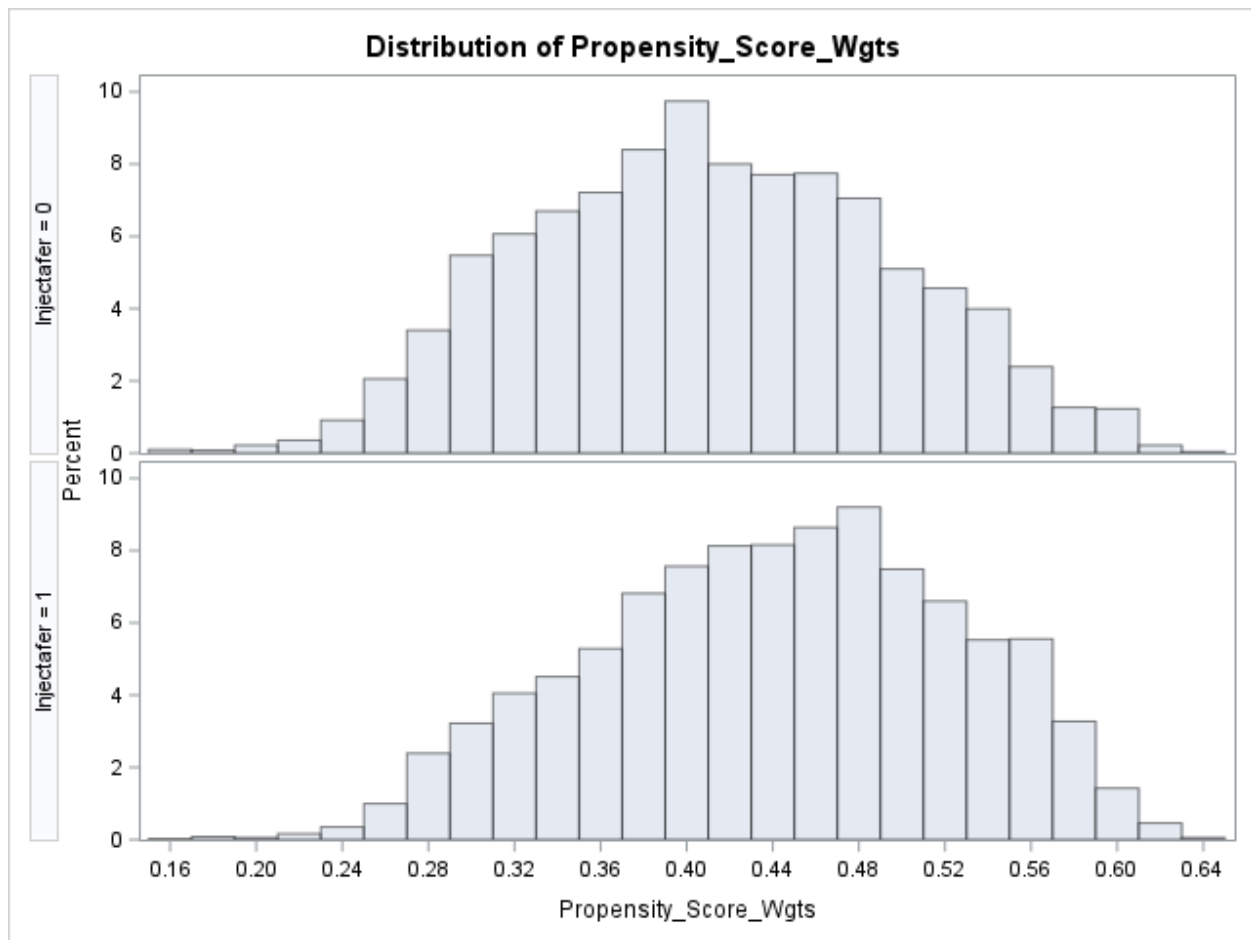

D. Cancer Cohort: FCM vs LDI

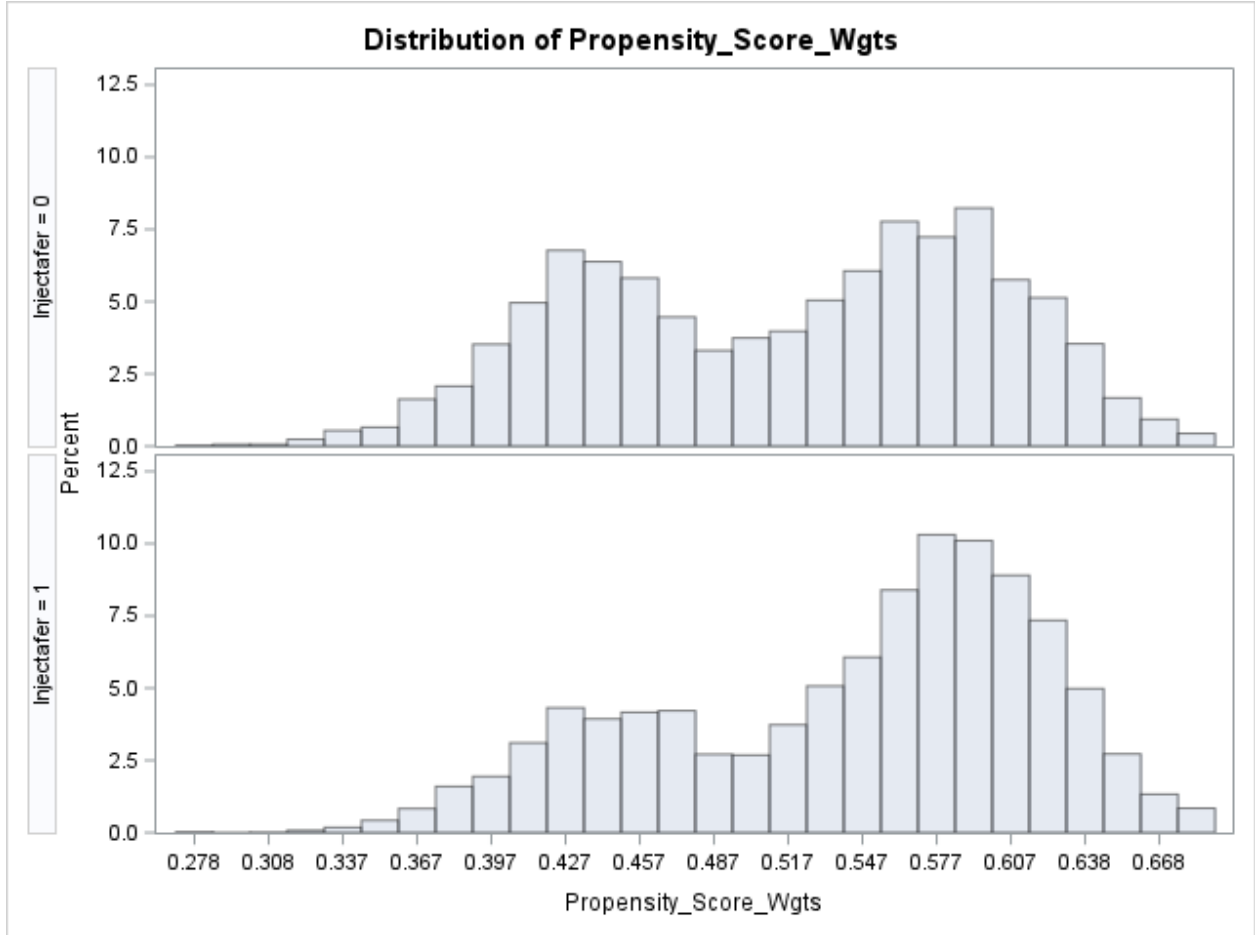

E. All Patient cohort: FCM vs IS

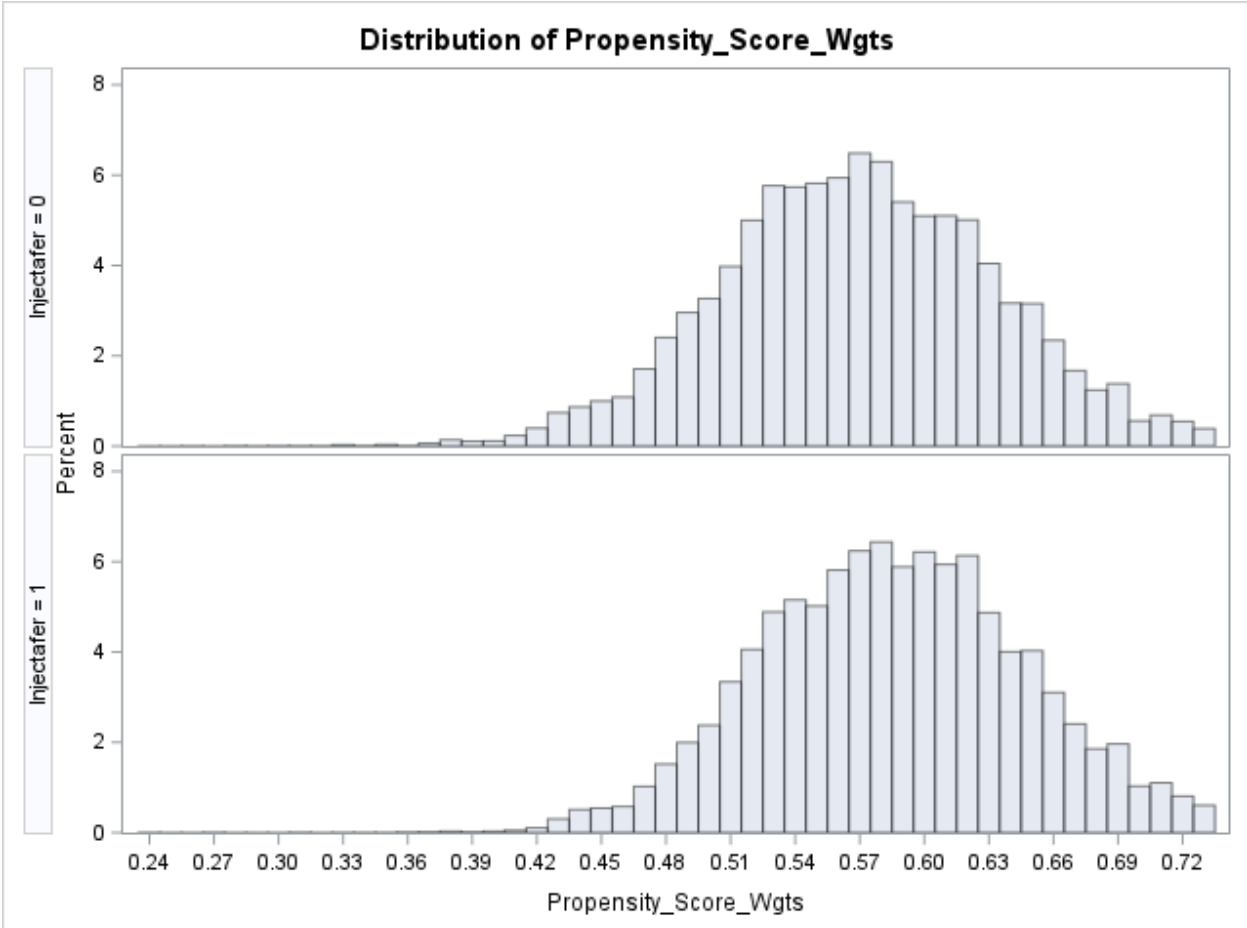

F. CHF Cohort: FCM vs IS

Distribution of Propensity\_Score\_Wgts

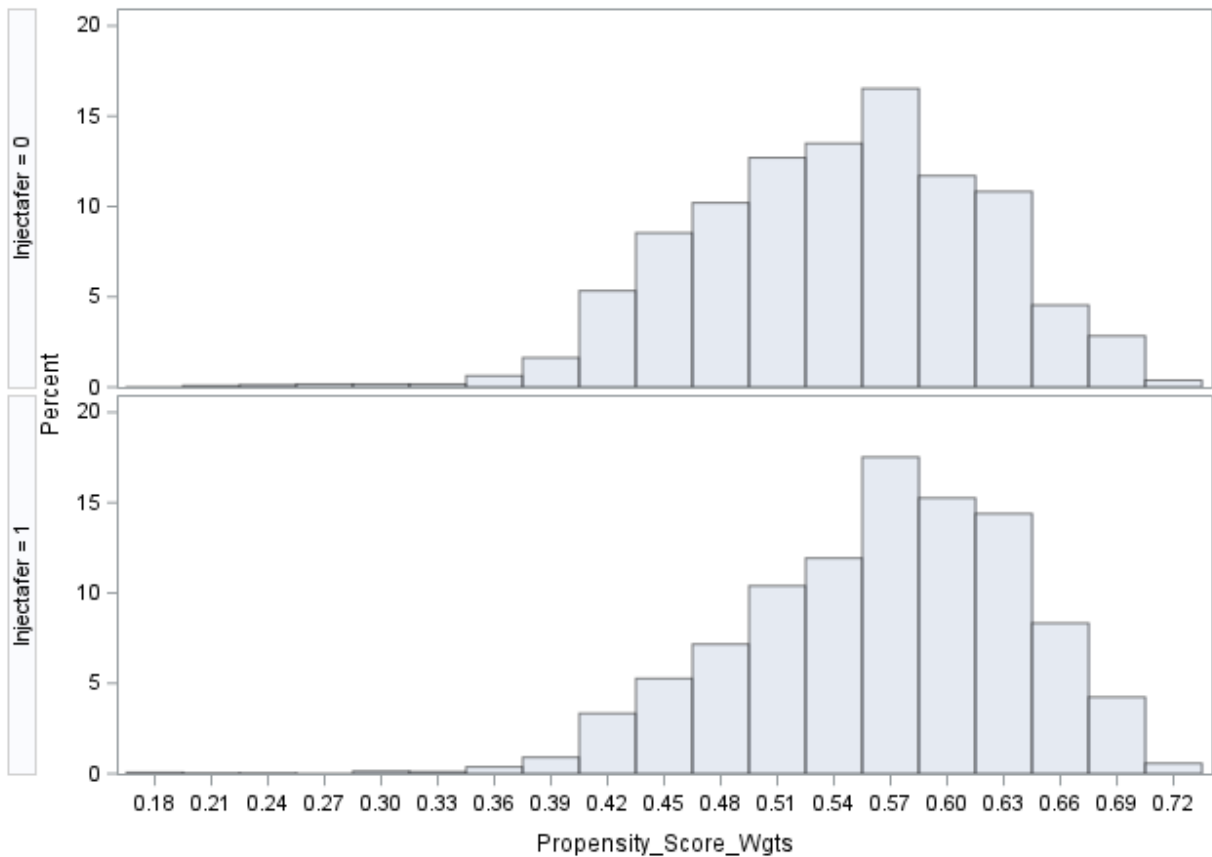

# G. CKD Cohort: FCM vs IS

## Distribution of Propensity\_Score\_Wgts

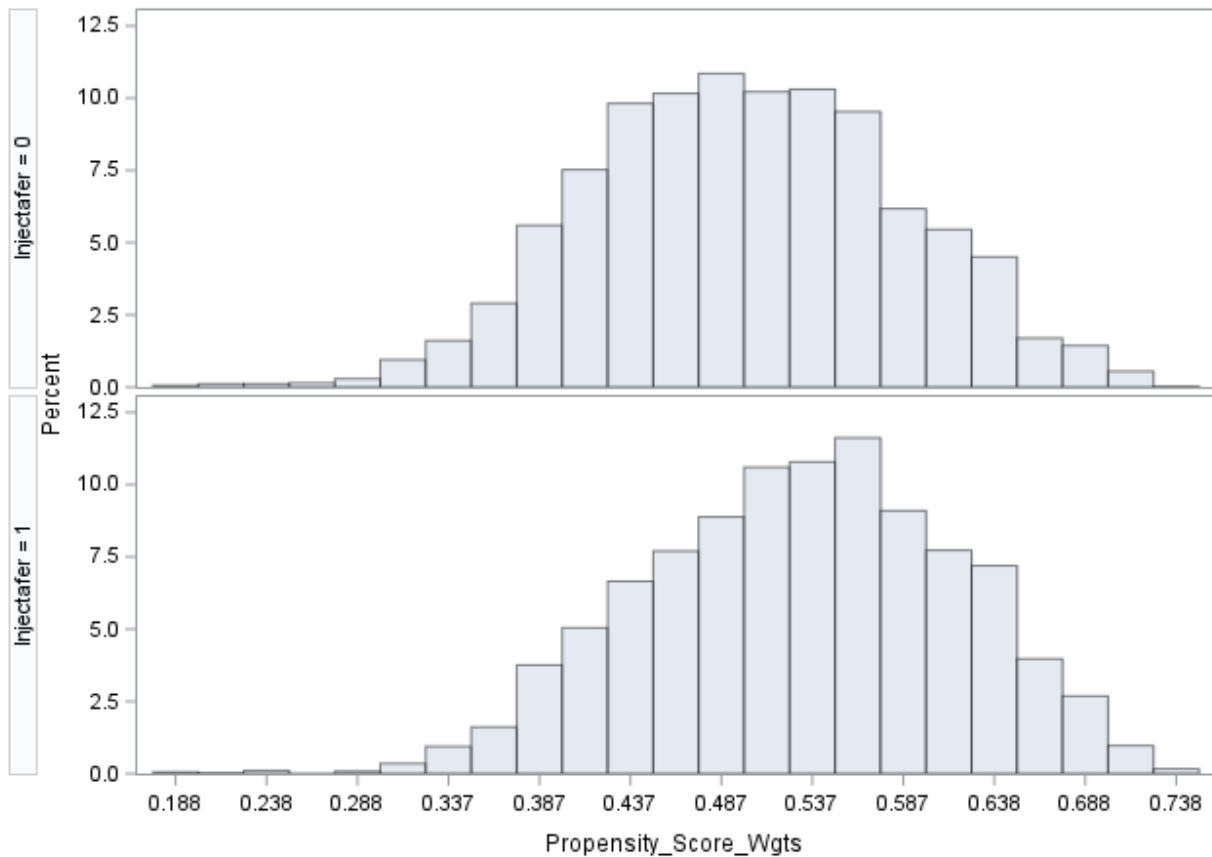



## H. Cancer Cohort: FCM vs IS

### Distribution of Propensity\_Score\_Wgts

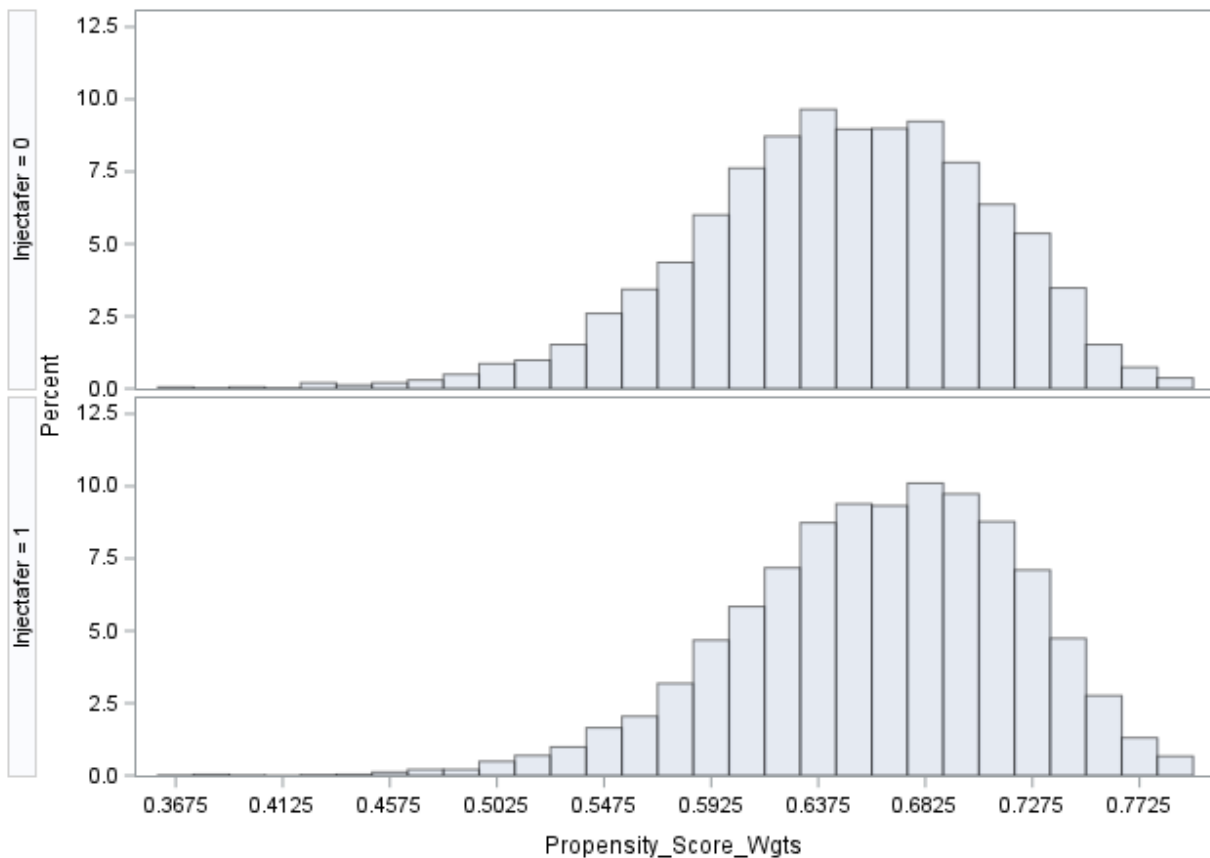

Supplement: MOESM2 [file 26876478]
